# Supplementary material
Source: PubMed Central journal article supplement (PMC3526918)
Supplement: s-20-00007-sup1.pdf [file s-20-00007-sup1.pdf]

## Supplementary Material.

Following the assumptions and derivation in Warkentin et al., 2012a, the steady-state temperature profile within a cylindrical crystal of radius  $r_2$  illuminated by a uniform circular X-ray beam of radius  $r_1 < r_2$  is

$$T(r) = -\frac{r^2 D}{2k} + \frac{Dr_1^2}{2k} \log\left(\frac{r_2}{r_1}\right) + \frac{Dr_1^2}{2} \left(\frac{1}{r_2 h} - \frac{1}{2k}\right) + T_{ambient}, \quad 0 < r < r_1,$$

$$T(r) = \frac{Dr_1^2}{2k} \log\left(\frac{r_2}{r}\right) + \frac{Dr_1^2}{2r_2 h} + T_{ambient}, \quad r_1 < r < r_2,$$

where  $D$  is the absorbed X-ray power per unit volume in units of  $\text{W}/\text{m}^3$  (proportional to the dose rate),  $k$  is the thermal conductivity of the cylinder, and  $h$  is the heat transfer coefficient for the boundary layer adjacent to the crystal's surface.
